# Supplementary material for: Chimeric Peptide Engineered Nanomedicine for Synergistic Suppression of Tumor Growth and Therapy-Induced Hyperlipidemia by mTOR and PCSK9 Inhibition
Source: Pharmaceutics. 2023 Sep 23;15(10):2377. doi: 10.3390/pharmaceutics15102377 (PMC10610039; doi:10.3390/pharmaceutics15102377)
Supplement: Supplementary file 1 [file pharmaceutics-15-02377-s001.zip › pharmaceutics-2580012-supplementary.pdf]

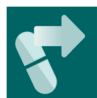

---

## Supplemental Materials

**Chimeric Peptide Engineered Nanomedicine for Synergistic Suppression of Tumor Growth and Therapy-Induced Hyper-lipidemia by mTOR and PCSK9 Inhibition**

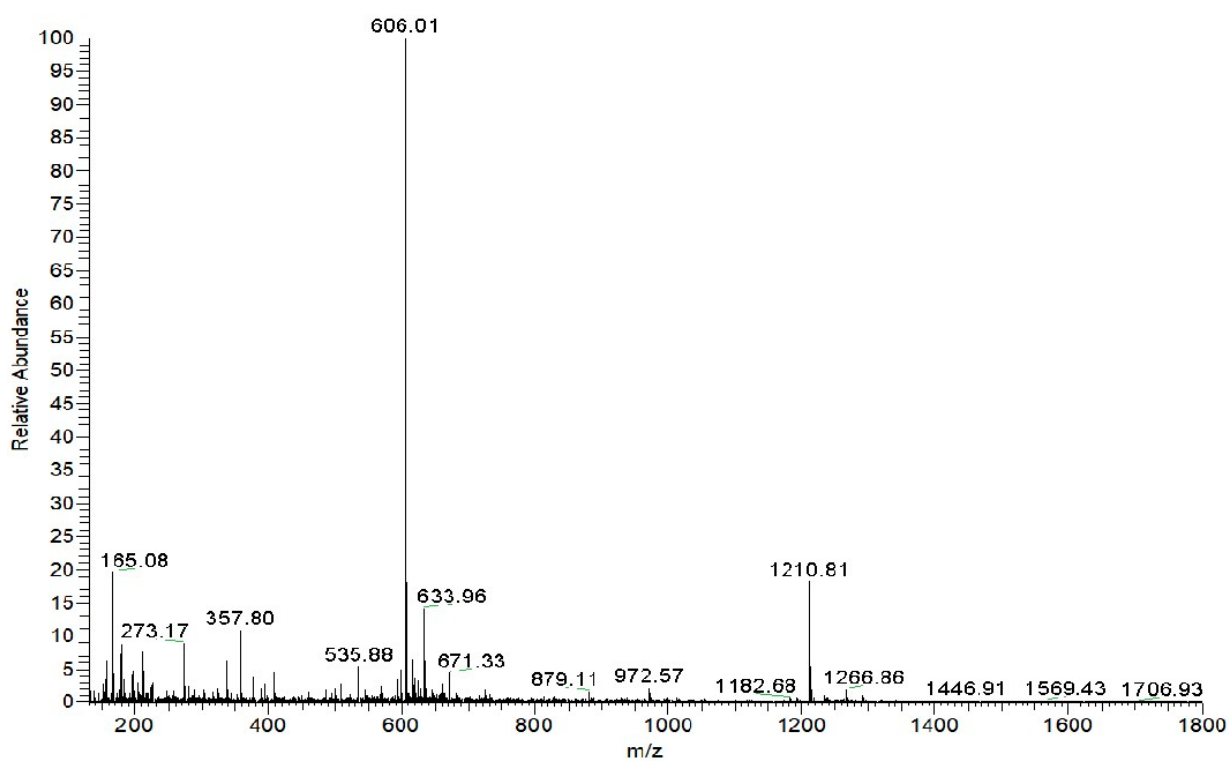

**Figure S1.** The mass spectrum of P nanoparticle.

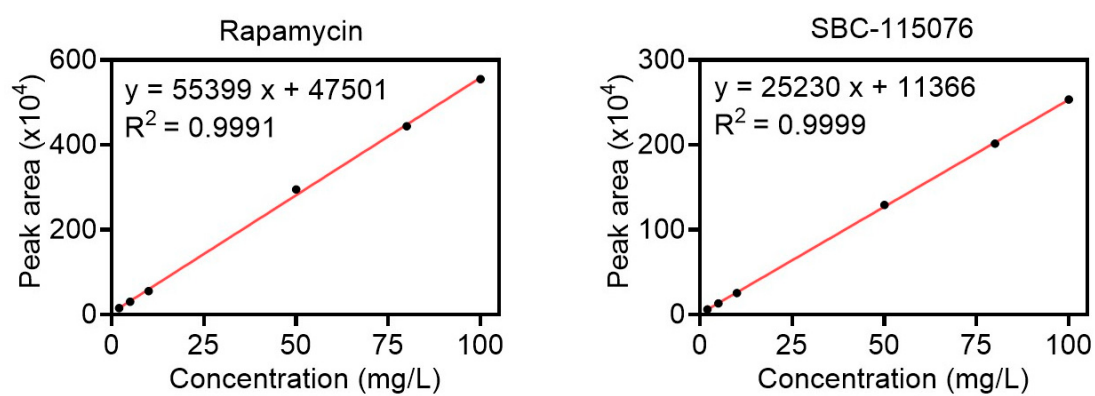

**Figure S2.** Linear equation between peak areas and concentrations of Rapamycin and SBC-115076 components by HPLC.

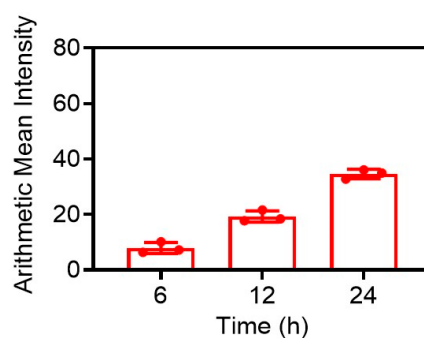

**Figure S3.** The arithmetic mean Intensity analysis of CLSM images of 4T1 cells after treatment with Cy5.5-PRS in the equivalent amount of Rapamycin (10 mg/L) for 6, 12 and 24 h.

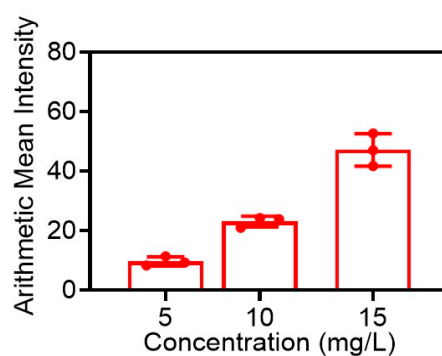

**Figure S4.** The arithmetic mean intensity analysis of CLSM images of 4T1 cells after treatment with Cy5.5-PRS for 24 h in the equivalent amount of Rapamycin (5, 10 and 15 mg/L).

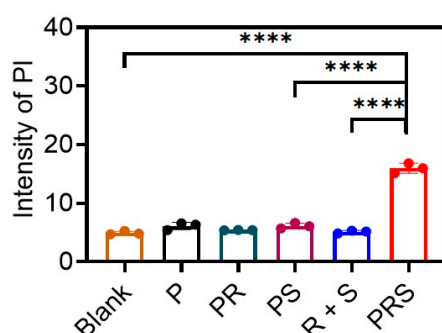

**Figure S5.** The mean intensity analysis of CLSM images of 4T1 cells by liver/dead cell staining assay. R + S represented the combined administration of Rapamycin and SBC-115076. \*\*\*\*P < 0.0005 was tested via a Student's t test.

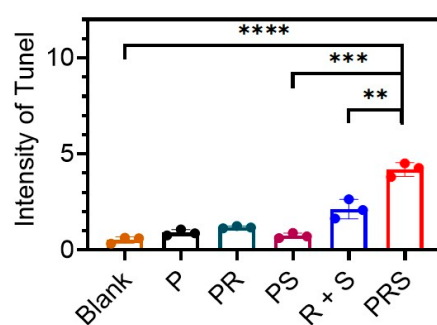

**Figure S6.** The mean intensity analysis of CLSM images of 4T1 cells by TUNEL immunofluorescence. R + S represented the combined administration of Rapamycin and SBC-115076. \*\*\*\*P <0.0005 was tested via a Student's t test.

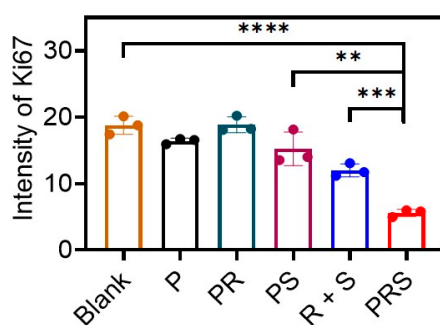

**Figure S7.** The mean Intensity analysis of CLSM images of 4T1 cells by the Ki67 immunofluorescence. R + S represented the combined administration of Rapamycin and SBC-115076. \*\*\*\*P <0.0005 was tested via a Student's t test.
